# Supplementary material
Source: HighWire-hosted journal article supplement (doi:10.1101/rna.034470.112)
Supplement: Figure_S4.docx [file Figure_S4.docx]

Figure S4

|  | ID | CDS+**stop codon(TAA)**+**3'UTR**+**SL**+**U tail** |
| --- | --- | --- |
| ARCA in WT | 1 | gtaacaaccgcgaaaaagttgcgcggaggagtngtgtttgtggangaagtaccgaaaggtcttaccggaaaactngacgcaagaaaagtcagagagatcntcataaaggccaagaanggnggaaagtccgantng**taaaangtaactntagnggannnnnnnnnnggctcttttcagngccactttttttttt** |
| 2 | gtaacaaccgcgaaaaagttgcgcggaggagttgtgtttgtggacgaagtaccgaaaggtcttaccggaaaactcgacgcaagaaaaatcagagagatcctcataaaggccaagaagggcggaaagtccgaattg**taaaatgtaactctagaggatccccacaaaggctcttttcagagccactttatttttttt** |
| 3 | gtaacaaccgcgaaaaagttgcgcggaggagttgtgtttgtggacgaagtaccga**tttattttttt** |
| 4 | gtaccaaccgcgaaaaagttgcgcggaggagttgtgtttgtggacgaagtaccgaaaggtcttaccggaaaactcgacgcaagaaaaatcagaganatcctcataaaggccaagaagggcggaaagtccaaattg**taaaatgtaactctagaggatccccacaaaggctcttttcagagccacttttt** |
| 5 | gtaacaaccgcgaaaaagttgcgcggaggagttgtg**tttttt** |
| 6 | gtaacaaccgcgaaaaaagttgcgcggaggagttgtg**ttttt** |
| 7 | gtaacaaccgcgaaaaagttgcgcggaggagttgtgtttgtggacgaagtaccgaaaggtcttaccggaaaactcgacgcaagaaaaatcagagagatcctcataaaggccaagaagggcggaaagtccaaattg**taaaatgtaactctagaggatccccacaaaggctctnttcagagcttttt** |
| 8 | gtaacaaccgcgaaaaagttncgcggaggagttgtg**tttttt** |
| 9 | gtaacaaccgcgaaaaagttgcgcggaggagttgtgtttgtggacgaagtaccgaaaggtcttaccggaaaactcgacgcaagaaaaatcagagagatcctcataaaggccaagaagggcggaaagtccaaattg**taaaatgtaactctagaggatccccacaaaggctcttttcagagccacttttttttt** |
| 10 | gtaacaaccgcgaaaaagttgcgcggaggagttgtgtttgtggacgaagtaccgaaaggtcttaccggaaaactcgacgcaagaaaaatcagagagatcctcataaaggccaagaagggcggaaagtccaaattg**taaaatgtaactctagaggatccccacaaaggctttttt** |
| BTH in WT | 11 | gtaacaaccgcgaaaaagttgcgcggaggag**ttttttttt** |
| 12 | gtaacaaccgcgaaaaagttgcgcggaggagttgtgtttgtggacgaagtaccgaaaggtcttaccggaaaactcgacgcaagaaaaatcagagagatcctcataaaggccaagaagggcggaaagtccaaattg**taaaatgtaactctagaggatccccacaaaggctcttttcagagccacttttttttt** |
| 13 | gtaacaaccgcgaaaaagttgcgcggaggag**tttttttt** |
| 14 | gtaacaaccgcgaaaaagttgcgcggaggagttgtgtttgtggacgaagtaccgaaaggtcttaccggaaaactcgacgcaagaaaaatcagagagatcctcataaaggccaagaagggcggaaagtccaaattg**taaaatgtaactctagaggatccccacaaaggctcttttcagagccactt** |
| 15 | gtaacaaccgcgaaaaagttgcgcggaggagttgtgtttgtggacgaagtaccgaaaggtcttaccggaaaactcgacgcaagaaaaatcagagagatcctcataaaggccaagaagggcggaaagtccaaattg**taaaatgtaactctagaggatccccacaaaggctcttttcagagccactt** |
| 16 | gtaacagccgcgaaaaagttgcgcggaggagttgtgtttgtggacgaagtaccgaaaggtcttaccggaaaactcgacgcaagaaaaatcagagagatcctcataaaggccaagaagggcggaaagtccaaattg**taaaatgtaactctagaggatccccacaaaggctcttttcagagccactt** |
| 17 | gtaacaaccgcgaaaaagttgcgcggaggagttgtgtttgtggacgaagtaccgaaaggtcttaccggaaaactcgacgcaagaaaaatcagagagatcctcataaaggccaagaagggcggaaagtccaaattg**taaaatgtaactctagaggntccccacaaaggctcttttcagagccactt** |
| 18 | gtaacaaccgcgaaaaagttgcgcggaggagttgtgtttgtggacgaagtaccgaaaggtcttaccggaaaactcgacgcaagaaaaatcagagagatcctcataaaggccaagaagggcggaaagtccaaattg**taaaatgtaactctagaggatccccacaaaggctcttttcagagccatt** |
| 19 | g**ttttt** |
| 20 | gtaacaaccgcgaaaaagttgcgcggaggagtcgtgtttgtggacgaagtaccgaaaggtcttaccggaaaactcgacgcaagaaaagtcagagagatcctcataaaggccaagaagggcggaaagtccaaattg**taaaangtaactctagaggatccccacaaaggcttttt** |
| 21 | gtaacaaccgcgaaaaagttgcgcggaggagttgtgtttgtggacgaagtaccgaaaggtcttaccggaaaactcgacgcaagaaaaatcagagagatcctcataaaggccaagaagggcggaaagtccgaattg**taaaatgtaactctagaggatccccacaaaggctcttttcagagccactttatttttttt** |
| ARCA in TUTase 4 KD | 22 | gtaacaaccgcgaaaaagttgcgcggaggagttgtgtttgtggacgaagtaccgaaaggtcttaccggaaaactcgacgcaagaaaaatcagagagatcctcataaaggccaagaagggcggaaagtccaaattg**taaaatgtaactctagaggatccccacaaaggctcttttcagagccactt** |
| 23 | gtaacaaccgngaaaaagntgcgnggagganntgtgtttgnggangaagtacngaaaggttttaccggaaaactnnangcaagaaaaatnngagnnatcntnntaaaggncaagaanggnggaaagtncaaattg**taaaangtaantntngaggnnccccacaaaggctnttttncnnnnnnc** |
| 24 | gcnnc**ttttttt** |
| 25 | g**ttttt** |
| 26 | g**ttttt** |
| 27 | g**ttttt** |
| 28 | taacaaccgcgaaaaagttgcgcggaggagttgtgtttgtggacgaagtaccgaaaggtcttaccggaaaactcgacgcaagaaaaatcagagagatcctcataaaggccaagaagggcggaaagtccaaattg**taaaatgtaactctagaggatccccacaaagtttttt** |
| 29 | taacaaccgcgaaaaagttgcgcggaggagttgtgtttgtggacgaagtaccgaaaggtcttaccggaaaactcgacgcaagaaaaatcagagagatcctcataaaggccaagaagggcggaaagtccaaattg**taaaatgtaactctagaggatccccacaaaggctcttttcagagccacttttt** |
| 30 | g**tttttt** |
| 31 | g**ttttt** |
| 32 | gtaacaaccgcgaaaaagttgcgcggaggagttgtgtttgtggacgaagtaccgaaaggtcttaccggaaaactcgacgcaagaaaaatcagagagatcctcataaaggccaagaagggcggaaagtccaaattg**taaaatgtaactctagagganccccacaaaggctttttt** |
| 33 | gtaacaaccgcgaaaaagttgcgcggaggagttgtgtttgtggacgaagtaccgaaaggtcttaccggaaaactcgacgcaagaaaaatcagagagatcctcataaaggccaagaagggcggaaagtccgaattg**taaaatgtaactctagaggatccccacaaaggctcttttcagagccactttatttttttt** |
| BTH in TUTase 4 KD | 34 | gtaacaaccgcgaaaaagttgcgcggaggagttgtgtttgtggacgaagtaccgaaaggtcttaccggaaaactcgacgcaagaaaaatcagagagatcctcataaaggccaagaagggcggaaagtccaaattg**taaaatgtaactctagagganccccacaaaggctcttttcagagccacttttt** |
| 35 | gtaacaaccgcgaaaaagttgcgcggaggagttgtgtttgtggacgaagtaccgaaaggtcttaccggaaaactcgacgcaagaaaaatcagagagatcctcataaaggccaagaagggcggaaagtccaaattg**taaaatgtaactctagaggatccccactttttttt** |
| 36 | gtaacaaccgcgaaaaagttgcgcggaggagttgtgtttgtggacgaagtaccgaaaggtcttaccggaaaactcgacgcaagaaaaatcagagagatcctcataaaggccaagaagggcggaaagtccaaattg**taaaatgtaactctagaggatccccacaaaggctcttttcagagccactttttttt** |
| 37 | gtaacaaccgcgaaaaagttgcgcggaggagttgtgtttgtggacgaagtaccgaaaggtcttaccggaaaactcgacgcaagaaaaatcagagagatcctcataaaggccaagaagggcggaaagtccaaattg**taaaatgtaactctagaggatccccacaaaggctcttttcagagccactttttttt** |
| 38 | gtaacaaccgcgaaaaagttgcgcggaggagttgtgtttgtgggcgaagtaccgaaaggtcttaccggaaaactcgacgcaagaaaaatcagagagatcctcataaaggccaagaagggcggaaagtccaaattg**tttttt** |
| 39 | g**ttttt** |
| 40 | g**ttttt** |
| 41 | g**ttttt** |
| 42 | gtaacaaccgcgaaaaagttgcgcggaggagttgtgtttgtggacgaagtaccgaaaggtcttaccggaaaactcgacgcaagaaaaatcagagagatcctcataaaggccaagaagggcggaaagtccaaattg**taaaatgtaactctagaggatccccacaaaggctcttttcagagccacttttt** |
| 43 | gtaacaaccgcgaaaaagttgcgcggaggagttgtgtttgtggacgaagtaccgnnnnnnnnnnnnngnnnnctngnnnnnnnnnnnnncnnngnnnnnnncnnnnnnnnnnnnngncgnnnnntccaaattg**ttttt** |
| 44 | gtaacaaccgcgaaaaagttgcgcgnnngnnnngngtttgtggacgaagtaccgaaaggtcttaccggaaaactcgacgcaagaaaaatcagagagatcctcataaaggccaagaagggcggaaagtccaaattg**taaaatgtaactctagaggatccccacaaaggctcttttt** |
| 45 | gtaacaaccgcgaaaaagttgcgcggaggagttgtgtttgtggacgaagtaccgaaaggtcttaccggaaaactcgacgcaagaaaaatcagagagatcctcataaaggccaagaagggcggaaagtccaaattg**taaaatgtaactctagaggatccccacaaaggctcttttcagagttttt** |
| 46 | gtaacaaccgcgaaaaagttgcgcggaggagttgtgtttgtggacgaagtaccgaaaggtcttaccggaaaactcgacgcaagaaaaatcagagagatcctcataaaggccaagaagggcggaaagtccgaattg**taaaatgtaactctagaggatccccacaaaggctcttttcagagccactttatttttttt** |
| 47 | gtaacaaccgcgaaaaagttgcgcggaggagttgtgtttgtggacgaagtaccgaaaggtcttaccggaaaactcgacgcaagaaaaatcagagagatcctcataaaggccaagaagggcggaaagtccaaattg**taaaatgtaactctagaggatccccacaaaggctcttttcagagccacttttt** |
| 48 | gtaacaaccgcgaaaaagttgcgcggaggagttgtgtttgtggacgaagtaccgaaaggtcttaccggaaaactcgacgcaagaaaaatcagagagatcctcataaaggccaagaagggcggaaagtccgaattg**taaaatgtaactctagaggatccccacaaaggctcttttcagagccactttatttttttt** |
| ARCA in WT + HU | 49 | taacaaccgcgaaaaaa**ccccttttt** |
| 50 | g**ttttt** |
| 51 | taacaaccgcgaaaaa**cnnncttttt** |
| 52 | taacaaccgcgaaaaaa**ccccttttt** |
| 53 | g**tttttt** |
| 54 | g**ttttt** |
| 55 | g**ttttt** |
| 56 | g**ttttt** |
| 57 | g**ttttt** |
| 58 | gtaacaaccgcgaaaaagttgcgcggaggagttgtgtttgtggacgaagtaccgaaaggtcttaccggaaaactcgacgcaagaaaaatcagagagatcctcataaaggccaagaagggcggaaagtccaaattg**taaaatgtaactctagaggatccccacaaaggctctttttt** |
| BTH in WT + HU | 59 | gtaacaaccgcgaaaaagttgcgcggaggagttg**ttttt** |
| 60 | g**ttttt** |
| 61 | g**ttttt** |
| 62 | gtaacaaccgcgnaaaanttgcgcnnnnnnnnngtg**tttttt** |
| 63 | g**ttttt** |
| 64 | g**ttttt** |
| 65 | gtaacaaccgcgaaaaagttgcgcggaggagttgtgtttgtggacgaagtaccgaaaggtcttaccggaaaactcgacgcaagaaaaatcagagagatcctcataaaggccaagaagggcggaaagtccaaattg**taaaatgtaactctagaggatccccacaaaggctttttt** |
| 66 | gtaacaaccgcgaaaaagttgcgcggaggagttgtgtttgtggacgaagtaccgaaaggtcttaccggaaaactcgangcnagaaaaatcagagnnnnnntcataaaggccnagaagggcggaaagtccaaattg**taaaatgtaactctagannntcnccacaaaggctcttttcagagttttt** |
| 67 | gtaacaaccgcgaagaagttgcgcggagg**ttttt** |
| 68 | gtaacaaccgcgaaaaagttgcgcgnnngnnnngtgtttgnggacgaagtaccgaaaggtcttaccggaaaactcgacgcaagaaaaatcagagagatcctcataagggccaagaagggcggaaagtccaaattg**taaaatgtaactctagaggatccccacaaaggctcttttcagagccactttttttt** |
| 69 | g**ttttt** |
| BTH in TUTase 4 KD + HU | 70 | gtaacaaccgcgaaaaagttgcgcggaggagttgtgtttgtggacgaagtaccgaaaggtcttaccggaaaactcgacgcaagaaaaatcagagagatcctcataaaggccaagaagggcggaaagtccaaattg**tttttt** |
| 71 | g**ttttt** |
| 72 | gtaacaaccgcgaaaaanttgcgcggaggagttgtgtttgtggacgaagtaccgaaaggtcttaccggaaaactcgacgcaagaaaaatcagagagatcctcataaaggccaagaagggcggaaagtccaaattg**taaaatgtaactctagaggatccccacaaagtttttt** |
| 73 | gtaacaaccgcgaaaaagttgcgcggaggagttgtg**tttttt** |
| 74 | gnnnnnnnnnnnnnncgnnnnntgnnnnnnnnnnnnnnnnnngnggagaagntnnnnnngtnnnnnagncnttnnnncanaannanannnntcnncntaanngncgnnanngncggannnncnncattg**taaaatgtnnntctnnangatncccncaaaggctcttttcnnanncacttttt** |
| 75 | gtaacaaccgcgaaaaagttgcgcggaggagttgtgtttgtggacgaagtaccgaaaggtcttaccggaaaactcgacgcaagaaaaatcagagagatcctcataaaggccaagaagggcggaaagtccaaattg**taaaatgtaactctagaggatccccacaaaggctttttt** |
| 76 | gtaacaaccgcgaaaaagttgcgcggaggagttgtgtttgtggacgaagtaccgaaaggtcttaccggaaaactcgacgcaagaaaaatcagagagatcctcataaaggccaagaagggcggaaagtccaaattg**taaaatgtaactctagaggatccccacaaaggctcttttcagagccacttttt** |
| 77 | g**tttttt** |
| 78 | gtaacaaccgcgaaaaagttgcgcggaggagttgtgtttgtggacgaagtaccgaaaggtcttaccggaaaactcgacgcaagaaaaatcagagagatcctcataaaggccaagaagggcggaaagtncaaattg**tttttt** |
| BTH in TUTase 3 KD | 79 | gtaacnnccncgaaaaagttgcgnnnnnnnnnngngnttgtggacgaagtaccgaaaggtcttaccggannnntcgacgcaagaaaaatcagagagatcctcataaaggccaagaagggcggaaagtccaaattg**taaaatgtaactctagaggatccccacaaaggctcttttcagagccacttttt** |
| 80 | nnannnnngnnnaaaaagttgcgngnnnnnnnnnnnnngtggacnaagtaccgaaaggtcttaccgnnnnnnnngangnanganaagncnnagagatcctcataaaggccaanaanggcggaaagtccaaattg**taaaatgtaactcnnnangatccccacaaaggctcttttcaganccacttttt** |
| 81 | gtcaagtaacaaccgcgaaaaagttgcgcggaggagttgtgtttgtggacgaagtaccgaaaggtcttaccggaaaactcgacgcaagaaaaatcagagagatcctcataaaggccaagaagggcggaaagtccaaattg**taaaatgtaactctagaggatccccacaaaggctc** |
| 82 | gtaacaaccgcgaaaaagttgcgcggaggagttgtgtttgtggacgaagtaccgaaaggtcttaccggaaaactcgacgcaagaaaaatcagagagatcctcataaaggccaagaagggcggaaagtccaaattg**taaaatgtaactctagaggatccccacaaaggctcttttcagagccacttttt** |
| 83 | g**ttttt** |
| 84 | g**ttttt** |
| 85 | g**ttttt** |
| 86 | g**ttttt** |
| 87 | g**ttttt** |
| 88 | g**ttttt** |
