# Supplementary material
Source: HighWire-hosted journal article supplement (doi:10.1101/rna.034470.112)
Supplement: Supplementary_Methods_and_Data.docx [file Supplementary_Methods_and_Data.docx]

# Supplementary Methods and Data

mRNAs Containing the Histone 3’ Stem-Loop Are Degraded Primarily
 by Decapping Mediated by Oligouridylation of the 3’ End

Wei Su1, Sergey V. Slepenkov1, Michael K. Slevin2, Shawn M. Lyons2,
Marcin Ziemniak3, Joanna Kowalska3, Edward Darzynkiewicz3,
Jacek Jemielity3, William F. Marzluff2 and Robert E. Rhoads1,4

1Department of Biochemistry and Molecular Biology, Louisiana State University Health Sciences Center, Shreveport, Louisiana, USA 71130-3932, 2Department of Biochemistry and Biophysics., University of North Carolina, North Carolina, USA 27599, and the 3Division of Biophysics, Institute of Experimental Physics, Faculty of Physics, University of Warsaw, Warsaw, Poland 02-089

4Corresponding author. e-mail [rrhoad@lsuhsc.edu](mailto:rrhoad@lsuhsc.edu)

# Supplementary methods

## Cell-cycle Analysis

HeLa cells synchronized by double-thymidine block and asynchronous cells were subjected to cell cycle analysis by flow cytometry ([Darzynkiewicz et al. 2001](#_ENREF_2)). Populations of G1 (2N DNA content), S-phase (2N < S < 4N DNA content), and G2/M (4N DNA content) were quantified using FACS DIVA software (version 6.1.3).

## Analysis of cordycepin incorporation

To test the extent of cordycepin incorporation, a 5-µl aliquot of the reaction mixture was removed and incubated with [α-32P]ATP and fresh poly(A) polymerase for 1 hr at 37°C. RNAs was separated from unincorporated NTPs with a NucAway spin column (Ambion), and the 32P content of RNA was measured by Cerenkov radiation.

# Supplemental References

Burns DM, D'Ambrogio A, Nottrott S, Richter JD. 2011. CPEB and two poly(A) polymerases control miR-122 stability and p53 mRNA translation. *Nature* **473:** 105-108.

Darzynkiewicz Z, Juan G. 2001. DNA content measurement for DNA ploidy and cell cycle analysis. In: *Current Protocols in Cytometry,* John Wiley & Sons, Inc.

Fasken MB, Leung SW, Banerjee A, Kodani MO, Chavez R, Bowman EA, Purohit MK, Rubinson ME, Rubinson EH, Corbett AH. 2011. Air1 Zinc Knuckles 4 and 5 and a Conserved IWRXY Motif Are Critical for the Function and Integrity of the Trf4/5-Air1/2-Mtr4 Polyadenylation (TRAMP) RNA Quality Control Complex. *J Biol Chem* **286:** 37429-37445.

Gruber AR, Lorenz R, Bernhart SH, Neuböck R, Hofacker IL. 2008. The Vienna RNA Websuite. *Nucleic Acids Res* **36:** W70-W74.

Heo I, Joo C, Cho J, Ha M, Han J, Kim VN. 2008. Lin28 mediates the terminal uridylation of *let-7* precursor microRNA. *Mol Cell* **32:** 276-284.

Jackman J, O'Connor PM. 2001. Methods for synchronizing cells at specific stages of the cell cycle. In: *Current Protocols in Cell Biology,* John Wiley & Sons, Inc.

Jones MR, Quinton LJ, Blahna MT, Neilson JR, Fu S, Ivanov AR, Wolf DA, Mizgerd JP. 2009. ZCCHC11-dependent uridylation of microRNA directs cytokine expression. *Nat Cell Biol* **11:** 1157-1163.

Katoh T, Sakaguchi Y, Miyauchi K, Suzuki T, Kashiwabara S-i, Baba T, Suzuki T. 2009. Selective stabilization of mammalian microRNAs by 3' adenylation mediated by the cytoplasmic poly(A) polymerase GLD-2. *Gene Dev* **23:** 433-438.

Kwak JE, Wang L, Ballantyne S, Kimble J, Wickens M. 2004. Mammalian GLD-2 homologs are poly(A) polymerases. *Proc Natl Acad Sci U S A* **101:** 4407-4412.

Mellman DL, Gonzales ML, Song C, Barlow CA, Wang P, Kendziorski C, Anderson RA. 2008. A PtdIns4,5P2-regulated nuclear poly(A) polymerase controls expression of select mRNAs. *Nature* **451:** 1013-1017.

Mullen TE, Marzluff WF. 2008. Degradation of histone mRNA requires oligouridylation followed by decapping and simultaneous degradation of the mRNA both 5' to 3' and 3' to 5'. *Genes Dev* **22:** 50-65.

Nagaike T, Suzuki T, Katoh T, Ueda T. 2005. Human mitochondrial mRNAs are stabilized with polyadenylation regulated by mitochondria-specific poly(A) polymerase and polynucleotide phosphorylase. *J Biol Chem* **280:** 19721-19727.

Rissland OS, Mikulasova A, Norbury CJ. 2007. Efficient RNA polyuridylation by noncanonical poly(A) polymerases. *Mol Cell Biol* **27:** 3612-3624.

Schmidt M-J, West S, Norbury CJ. 2011. The human cytoplasmic RNA terminal U-transferase ZCCHC11 targets histone mRNAs for degradation. *RNA* **17:** 39-44.

Shcherbik N, Wang M, Lapik YR, Srivastava L, Pestov DG. 2010. Polyadenylation and degradation of incomplete RNA polymerase I transcripts in mammalian cells. *EMBO Rep* **11:** 106-111.

Su W, Slepenkov S, Grudzien-Nogalska E, Kowalska J, Kulis M, Zuberek J, Lukaszewicz M, Darzynkiewicz E, Jemielity J, Rhoads RE. 2011. Translation, stability, and resistance to decapping of mRNAs containing caps substituted in the triphosphate chain with BH3, Se, and NH. *RNA* **17:** 978-988.

Tomecki R, Dmochowska A, Gewartowski K, Dziembowski A, Stepien PP. 2004. Identification of a novel human nuclear-encoded mitochondrial poly(A) polymerase. *Nucleic Acids Res* **32:** 6001-6014.

Trippe R, Guschina E, Hossbach M, Urlaub H, Lührmann R, Benecke B-J. 2006. Identification, cloning, and functional analysis of the human U6 snRNA-specific terminal uridylyl transferase. *RNA* **12:** 1494-1504.

Wilusz CJ, Wilusz J. 2008. New ways to meet your (3') end—oligouridylation as a step on the path to destruction. *Gene Dev* **22:** 1-7.

Wyman SK, Knouf EC, Parkin RK, Fritz BR, Lin DW, Dennis LM, Krouse MA, Webster PJ, Tewari M. 2011. Post-transcriptional generation of miRNA variants by multiple nucleotidyl transferases contributes to miRNA transcriptome complexity. *Genome Res* **21:** 1450-1461.

**Table S1.** Summary of human terminal uridylyltransferases (TUTases)a

| **NCBI Symbolb** | **Enzyme Nameb** | **Other names** | **Functions** | **Localization** |
| --- | --- | --- | --- | --- |
| TUT1 | Terminal uridylyl transferase 1, U6 snRNA-specific | PAPD2, RBM21, STARPAP | Poly(U) polymerase to recycle U6 snRNA ([Trippe et al. 2006](#_ENREF_18)); ortholog of yeast Cid1 poly(U) polymerase ([Rissland et al. 2007](#_ENREF_13)); nulear poly(A) polymerase ([Mellman et al. 2008](#_ENREF_10)); miRNA 3’ uridylation ([Wyman et al. 2011](#_ENREF_20)) | Nucleus |
| PAPD4 | PAP associated domain containing 4 | GLD2, TUTase 2 | Cytoplasmic poly(A) polymerase ([Kwak et al. 2004](#_ENREF_9)); ortholog of yeast Cid1 poly(U) polymerase ([Rissland et al. 2007](#_ENREF_13)); miRNA 3’ adenylation ([Katoh et al. 2009](#_ENREF_8)) | Cytoplasm |
| PAPD5 | PAP associated domain containing 5 | TUTase 3, TRF4-2 | Ortholog of yeast Cid1 poly(U) polymerase ([Rissland et al. 2007](#_ENREF_13)); Poly(U) polymerase involved in histone mRNA turnover ([Mullen et al. 2008](#_ENREF_11)); a nuclear noncanonical poly(A) polymerase that polyadenylates aberrant pre-ribosomal RNAs in mammalian cells ([Shcherbik et al. 2010](#_ENREF_15)); associates with a CPEB/p53 mRNA complex ([Burns et al. 2011](#_ENREF_1)) | Nucleus Cytoplasm |
| ZCCHC11 | Zinc finger, CCHC domain containing 11 | TUTase 4, PAPD3 | Ortholog of yeast Cid1 poly(U) polymerase ([Rissland et al. 2007](#_ENREF_13)); Poly(U) polymerase mediating uridylation of miRNA ([Heo et al. 2008](#_ENREF_5)) ([Jones et al. 2009](#_ENREF_7)); involved in histone mRNA turnover ([Schmidt et al. 2011](#_ENREF_14)) | Cytoplasm |
| PAPD7 | PAP associated domain containing 7 | TUTase 5, TRF4-1 | Function in human not determined; Yeast ortholog is involved in degrading non-coding RNA as a PAP in TRAMP complex (Trf4/5-Air1/2-Mtr4 polyadenylation complex) ([Fasken et al. 2011](#_ENREF_3)) | Nucleus |
| ZCCHC6 | Zinc finger, CCHC domain containing 6 | Hs2, PAPD6, TUTase 7 | Ortholog of yeast Cid1Poly(U) polymerase ([Rissland et al. 2007](#_ENREF_13)); miRNA 3’ uridylation ([Wyman et al. 2011](#_ENREF_20)) | ND |
| MTPAP | Mitochondrial poly(A) polymerase | PAPD1, TUTase 1 | Mitochondrial PAP ([Nagaike et al. 2005](#_ENREF_12)) ([Tomecki et al. 2004](#_ENREF_17)); ortholog of yeast Cid1 poly(U) polymerase ([Rissland et al. 2007](#_ENREF_13)); histone mRNA poly(U) polymerase ([Mullen et al. 2008](#_ENREF_11)); miRNA 3’ uridylation ([Wyman et al. 2011](#_ENREF_20)) | Mitochondria |

aModified and updated from a previously published table ([Wilusz et al. 2008](#_ENREF_19)).

bSymbols and names are adapted from the NCBI Gene website. The citations where the functions were originally reported are listed.

# Supplementary Figure Legends

**FIGURE S1.** Effect of nucleoporation on cell cycle progression. Asynchronous HeLa cells (*A*) were synchronized by double-thymidine block (*B*). Cells were either nucleoporated 3 h later (mid-S-phase) and then re-plated (*C*) or left on the original dishes (*D*). After another 3 h, nucleoporated cells had progressed through rest of S-phase (*E*) but not as fast as control cells (**F**). After a total of 6 h post-nucleoporation (9 h after release from double-thymidine block), 43% of the nucleorporated cells (*G*) and 78% of control cells (*H*) had reached G2.

**FIGURE S2.** Effect of nucleoporation and HU on DNA synthesis. After nucleoporation, cells were divided into two groups. One group was treated with 5 mM HU (*open symbols*) and the other was untreated (*closed symbols*). Aliquots of cells from each group were labeled with 3H-dTTP for 1 h before nucleoporation (0-time point) and at 1-h intervals up to 4 h. Cells were lysed with 10% SDS. DNA was precipitated with TCA on a filter disk and subjected to scintillation counting as described previously ([Jackman et al. 2001](#_ENREF_6)).

**FIGURE S3.** Analysis of LC-RT-PCR products of ARCA-Luc-SL by PAGE on an 8% denaturing gel. Samples were treated as in Fig. 5. *Lanes 1* and *30* are DNA markers (*M*). *Lanes* *2* and *16* (*N*) are LC-RT-PCR products of RNA isolated from HeLa cells into which no Luc-SL mRNAs had been introduced by nucleoporation. *Lanes 15* and *29* (*C*) are PCR reactions that did not receive any cDNA (non-template control). Lanes *3–14* are OU1 products of ARCA-Luc-SL isolated from cells at the indicated times with or without HU treatment. *Lanes 16–28* are OU2 products of ARCA-Luc-SL mRNAs taken at the indicated times with or without HU treatment. The gel was exposed to film for 4 h.

**FIGURE S4.** Sequences of LC-RT-PCR products amplified with the OU2 primer. The products were cloned and sequenced as described in *Materials and methods*. A total of 106 plasmids with potentially positive inserts were sent for sequencing, 88 of which were found to contain Luc-SL sequences. The following sequence elements are highlighted: stop codon (*blue*), 3’-UTR (*orange*), SL (*green*), and oligo(U) tract (*red*). The sequences of the upstream Luc primer and downstream P1 primers were found in all clones but are not shown here.

**FIGURE S5.** Knocking down TUTase 3 does not change the length of the lag phase or t1/2 of the rapid-decay phase of ARCA-Luc-SL or BTH-Luc-SL. (*A*) TUTase 3 mRNA level in uninfected cells (UN) and cells infected with lentivirus expressing either NT or TUTase 3 shRNAs (TUTase 3 KD). The length of the lag phase for the loss of both 5’ and 3’ sequences was measured for ARCA-Luc-SL (*B***)** and BTH-Luc-SL (*C*) in NT or TUTase 3 KD (T3) cells. The t½ for the rapid-decay phase was measured for the loss of both 5’ and 3’ sequences in ARCA-Luc-SL (*D*) and BTH-Luc-SL (*E***)** in NT or TUTase 3 KD cells. Error bars represent SEM for three separate experiments.

**FIGURE S6.** Extent of cordycepin incorporation and translational efficiency of cordycepin-modified mRNAs. Four types of mRNAs were modified by incubation of cordycepin 5’-triphosphate and yeast poly(A) polymerase (PAP) as described in *Materials and methods*. ARCA-Luc-SL*, BTH-Luc-SL*, ARCA-Luc-SL-U10*, and BTH-Luc-SL-U10*. To determine the degree of cordycepin incorporation, a second reaction was carried on aliquots of the original reaction with fresh PAP and [α-32P]ATP. Incorporation of 32P into the modified mRNAs was <5% that of unmodified ARCA-Luc-SL. Addition of a cordycepin moiety to either ARCA-Luc-SL or BTH-Luc-SL (*B*) or to ARCA-Luc-SL-U10 or ARCA-Luc-SL-U10 (*C*) does not significantly alter their translational efficiencies in HeLa cells. Data are normalized for the protein concentration and amount of luciferase mRNA present in each lysate. As previously reported ([Su et al. 2011](#_ENREF_16)), the BTH cap increases translational efficiency by ~2-fold compared to the ARCA cap. Notably, the Luc-SLU10 mRNAs are translated less efficiently than the corresponding Luc-SL mRNAs.
